# Supplementary material for: Ischemic Stroke and Transient Ischemic Attack Risk Following Vitamin K Antagonist Cessation in Newly Diagnosed Atrial Fibrillation: A Cohort Study
Source: PubMed Central journal article supplement — J Am Heart Assoc. 2020 Jan 15;9(2):e014376. doi: 10.1161/JAHA.119.014376 (PMC7033838; doi:10.1161/jaha.119.014376), 2020-01-15
Supplement: JAH3-9-e014376-s001.pdf [file JAH3-9-e014376-s001.pdf]

# **SUPPLEMENTAL MATERIAL**

**Table S1. Sensitivity analyses on discontinuation of VKA treatment and the risk of stroke/TIA, by time since incident AF - (a) using 60-day grace period instead of 30-day grace period, (b) excluding AF patients with previous stroke/TIA, (c) restricting analysis to subset with AF onset after Jan 2008, (d) excluding AF patients with stroke/TIA within 60 days after AF and (e) subset with ischemic strokes only.**

|                                                          | Cases<br>n (%) | Controls<br>n (%) | Crude RR<br>(95%-CI) | Adjusted RR<br>(95%-CI) | Excess IR per 100 PY<br>(95%-CI) |
|----------------------------------------------------------|----------------|-------------------|----------------------|-------------------------|----------------------------------|
| <b>a. Grace period of 60 days</b>                        |                |                   |                      |                         |                                  |
| Total                                                    | 581            | 2625              |                      |                         |                                  |
| Current VKA use                                          | 370 (63.68)    | 2133 (81.26)      | 1                    | 1                       | 0                                |
| VKA discontinued                                         | 211 (36.32)    | 492 (18.74)       | 2.77 (2.23 - 3.46)   | 2.73 (2.18 - 3.41)      | 1.71 (1.15 to 2.28)              |
| VKA discontinued ≤ 365 days                              | 94 (16.18)     | 184 (7.01)        | 3.19 (2.37 - 4.29)   | 3.11 (2.30 - 4.22)      | 2.27 (1.33 to 3.20)              |
| VKA discontinued ≤120 days                               | 49 (8.43)      | 95 (3.62)         | 3.17 (2.16 - 4.66)   | 3.21 (2.17 - 4.74)      | 2.72 (1.05 to 4.39)              |
| VKA discontinued >120 to ≤365 days                       | 45 (7.75)      | 89 (3.39)         | 3.20 (2.13 - 4.82)   | 3.01 (1.99 - 4.56)      | 2.01 (0.63 to 3.39)              |
| VKA discontinued >365 days                               | 117 (20.14)    | 308 (11.73)       | 2.46 (1.86 - 3.26)   | 2.42 (1.82 - 3.23)      | 1.18 (0.70 to 1.66)              |
| <b>b. Excluding patients with history of stroke/TIA</b>  |                |                   |                      |                         |                                  |
| Total                                                    | 365            | 1531              |                      |                         |                                  |
| Current VKA use                                          | 207 (56.71)    | 1194 (77.99)      | 1                    | 1                       | 0                                |
| VKA discontinued                                         | 158 (43.29)    | 337 (22.01)       | 3.01 (2.29 - 3.96)   | 3.00 (2.27 - 3.97)      | 1.66 (1.06 to 2.26)              |
| VKA discontinued ≤ 365 days                              | 64 (17.53)     | 131 (8.56)        | 3.03 (2.09 - 4.39)   | 2.96 (2.03 - 4.31)      | 1.75 (0.83 to 2.67)              |
| VKA discontinued ≤120 days                               | 33 (9.04)      | 62 (4.05)         | 3.05 (1.89 - 4.93)   | 2.99 (1.84 - 4.86)      | 1.76 (0.24 to 3.27)              |
| VKA discontinued >120 to ≤365 days                       | 31 (8.49)      | 69 (4.51)         | 3.00 (1.81 - 4.97)   | 2.92 (1.74 - 4.89)      | 1.47 (0.10 to 2.84)              |
| VKA discontinued >365 days                               | 94 (25.75)     | 206 (13.46)       | 2.99 (2.09 - 4.27)   | 3.05 (2.12 - 4.38)      | 1.43 (0.86 to 1.99)              |
| <b>c. AF onset after Jan 2008</b>                        |                |                   |                      |                         |                                  |
| Total                                                    | 204            | 921               |                      |                         |                                  |
| Current VKA use                                          | 141 (69.12)    | 770 (83.60)       | 1                    | 1                       | 0                                |
| VKA discontinued                                         | 63 (30.88)     | 151 (16.40)       | 2.52 (1.71 - 3.71)   | 2.45 (1.63 - 3.67)      | 1.79 (0.56 to 3.01)              |
| VKA discontinued ≤ 365 days                              | 39 (19.12)     | 83 (9.01)         | 2.78 (1.75 - 4.43)   | 2.62 (1.61 - 4.25)      | 2.04 (0.56 to 3.52)              |
| VKA discontinued ≤120 days                               | 20 (9.80)      | 45 (4.89)         | 2.55 (1.41 - 4.62)   | 2.51 (1.34 - 4.70)      | 2.05 (-0.65 to 4.75)             |
| VKA discontinued >120 to ≤365 days                       | 19 (9.31)      | 38 (4.13)         | 3.09 (1.64 - 5.82)   | 2.74 (1.42 - 5.27)      | 2.22 (-0.84 to 5.28)             |
| VKA discontinued >365 days                               | 24 (11.76)     | 68 (7.38)         | 2.16 (1.20 - 3.86)   | 2.20 (1.20 - 4.03)      | 0.97 (-0.05 to 1.99)             |
| <b>d. Excluding stroke/TIA in first 60 days after AF</b> |                |                   |                      |                         |                                  |
| Total                                                    | 405            | 1726              |                      |                         |                                  |
| Current VKA use                                          | 221 (54.57)    | 1286 (74.51)      | 1                    | 1                       | 0                                |
| VKA discontinued                                         | 184 (45.43)    | 440 (25.49)       | 2.48 (1.95 - 3.16)   | 2.57 (2.00 - 3.29)      | 1.49 (0.99 to 1.98)              |

|                                    | <b>Cases<br/>n (%)</b> | <b>Controls<br/>n (%)</b> | <b>Crude RR<br/>(95%-CI)</b> | <b>Adjusted RR<br/>(95%-CI)</b> | <b>Excess IR per 100 PY<br/>(95%-CI)</b> |
|------------------------------------|------------------------|---------------------------|------------------------------|---------------------------------|------------------------------------------|
| VKA discontinued ≤ 365 days        | 80 (19.75)             | 181 (10.49)               | 2.54 (1.85 - 3.49)           | 2.60 (1.88 - 3.60)              | 1.66 (0.82 to 2.50)                      |
| VKA discontinued ≤120 days         | 40 (9.88)              | 95 (5.50)                 | 2.29 (1.51 - 3.47)           | 2.44 (1.59 - 3.72)              | 1.75 (0.17 to 3.33)                      |
| VKA discontinued >120 to ≤365 days | 40 (9.88)              | 86 (4.98)                 | 2.86 (1.85 - 4.43)           | 2.80 (1.79 - 4.39)              | 1.87 (0.50 to 3.23)                      |
| VKA discontinued >365 days         | 104 (25.68)            | 259 (15.01)               | 2.44 (1.78 - 3.35)           | 2.54 (1.83 - 3.53)              | 1.34 (0.77 to 1.92)                      |
| <b>e. Ischemic stroke</b>          |                        |                           |                              |                                 |                                          |
| Total                              | 287                    | 1245                      |                              |                                 |                                          |
| Current VKA use                    | 157 (54.70)            | 975 (78.31)               | 1                            | 1                               | 0                                        |
| VKA discontinued                   | 130 (45.30)            | 270 (21.69)               | 3.08 (2.29 - 4.16)           | 3.11 (2.28 - 4.24)              | 1.19 (0.75 to 1.63)                      |
| VKA discontinued ≤365 days         | 60 (20.91)             | 112 (9.00)                | 3.40 (2.29 - 5.04)           | 3.31 (2.21 - 4.96)              | 1.41 (0.65 to 2.17)                      |
| VKA discontinued ≤120 days         | 30 (10.45)             | 55 (4.42)                 | 3.08 (1.86 - 5.10)           | 2.79 (1.66 - 4.70)              | 1.24 (0.03 to 2.45)                      |
| VKA discontinued >120 to ≤365 days | 30 (10.45)             | 57 (4.58)                 | 3.87 (2.19 - 6.86)           | 4.14 (2.30 - 7.43)              | 1.86 (0.39 to 3.34)                      |
| VKA discontinued >365 days         | 70 (24.39)             | 158 (12.69)               | 2.81 (1.90 - 4.17)           | 2.94 (1.95 - 4.43)              | 0.95 (0.51 to 1.39)                      |

AF: Atrial fibrillation; CI: Confidence interval; IR: Incidence rate; RR: Relative risk; PY: Person-years; TIA: Transient ischemic attack; VKA: Vitamin-K antagonist.

\*: RR adjusted for smoking, body mass index, presentation of AF (i.e. ambulatory, primary hospital discharge, and non-primary hospital discharge diagnosis), and all CHA<sub>2</sub>DS<sub>2</sub>-VASc score components except for age and gender.
